# Supplementary material for: Synergy in Cystic Fibrosis Therapies: Targeting SLC26A9
Source: MDPI journal article supplement (doi:10.3390/ijms222313064), 2021-12-02

Figure S1

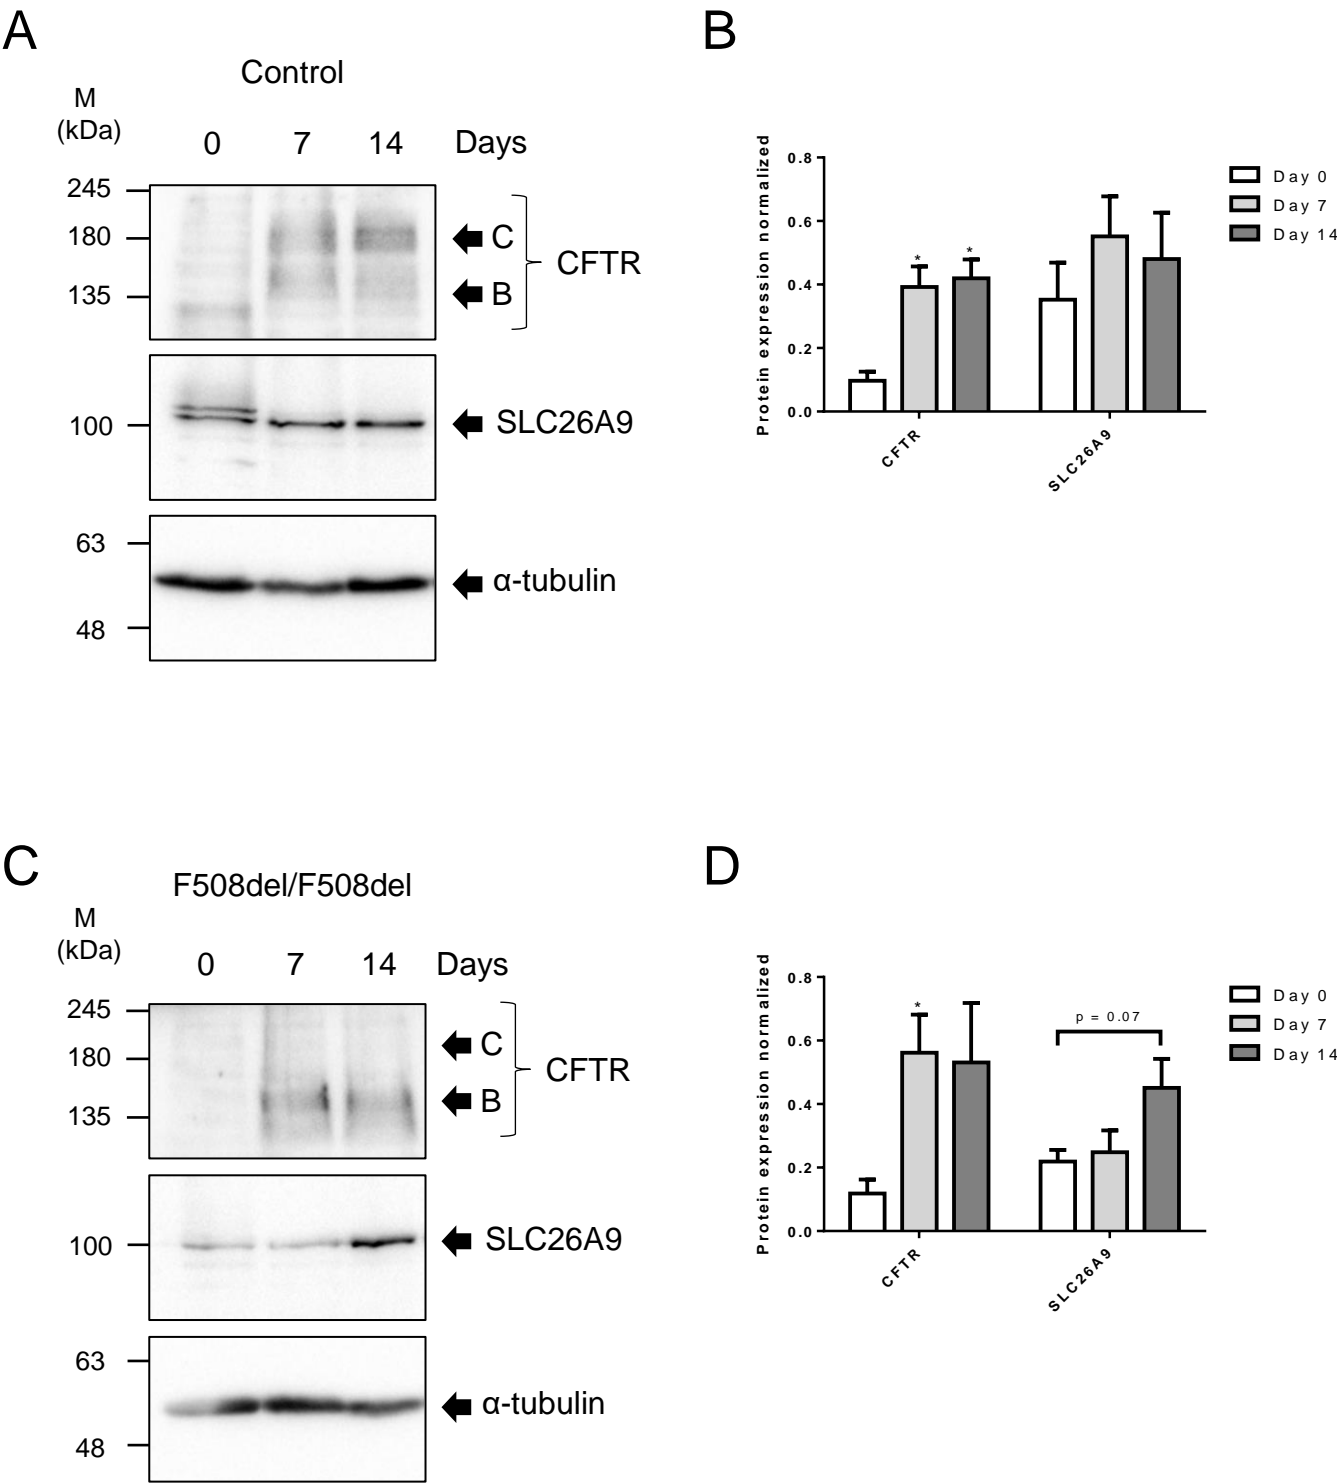

Figure S2

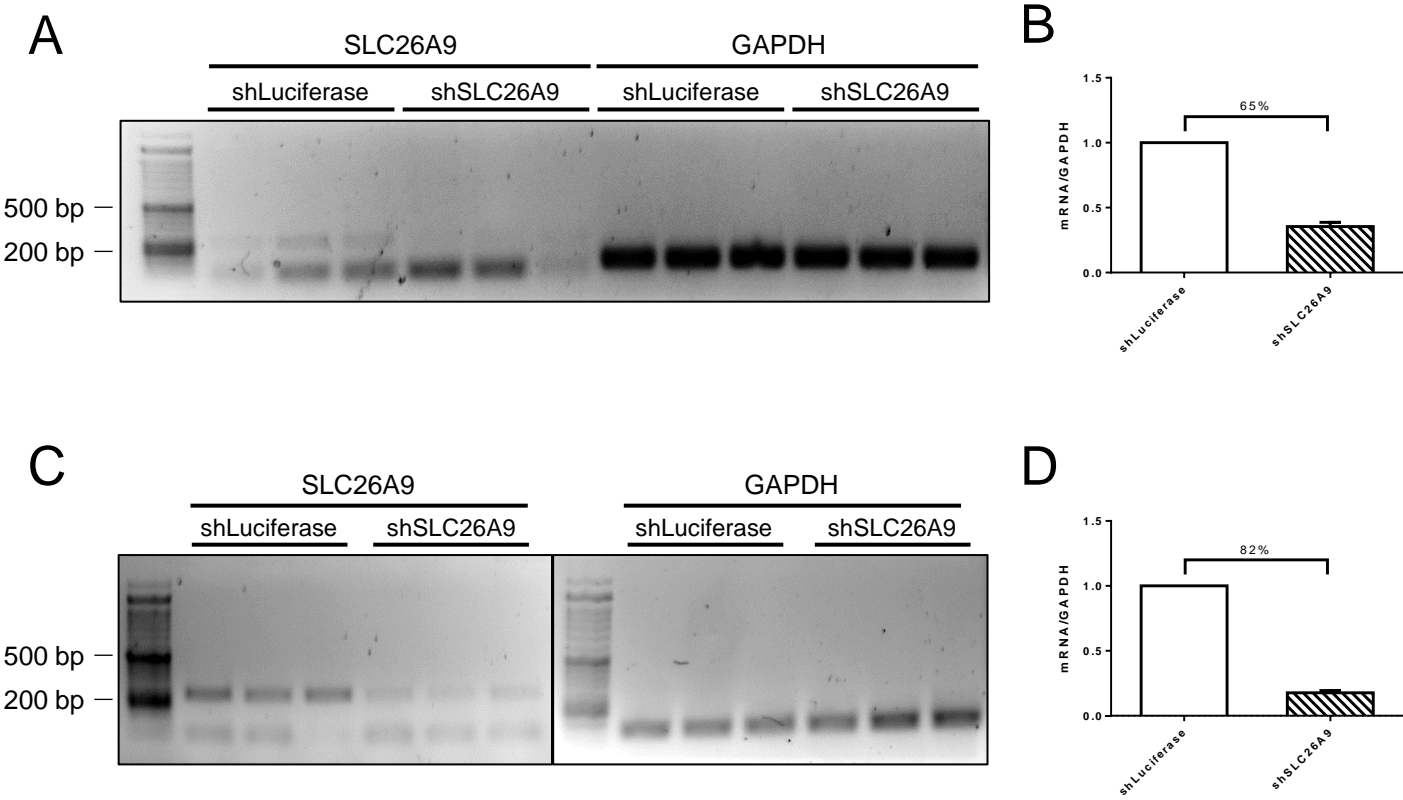

Figure S3

A

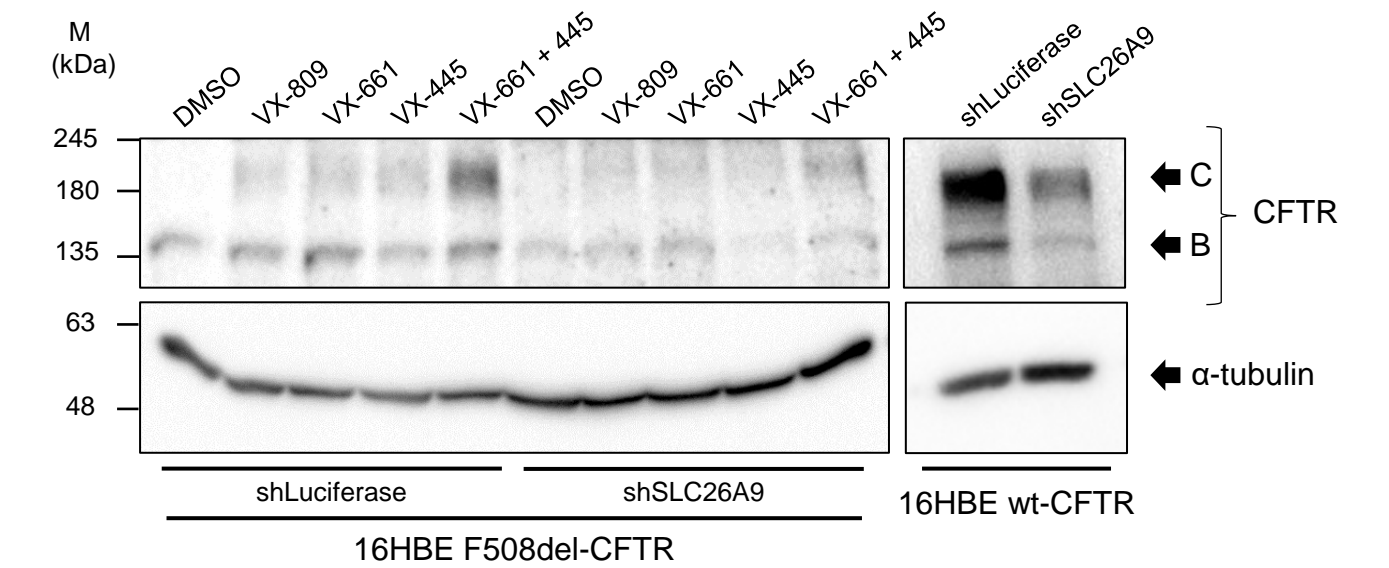

B

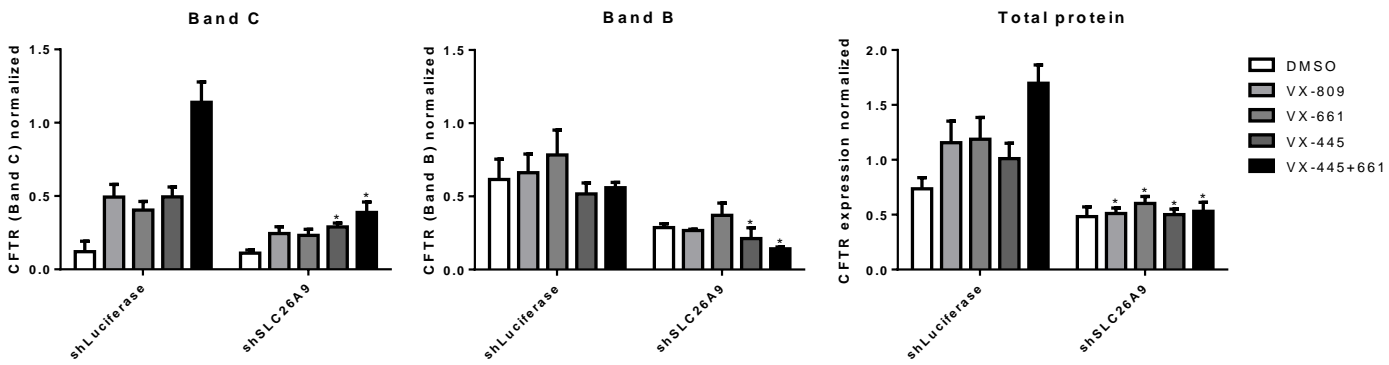

C

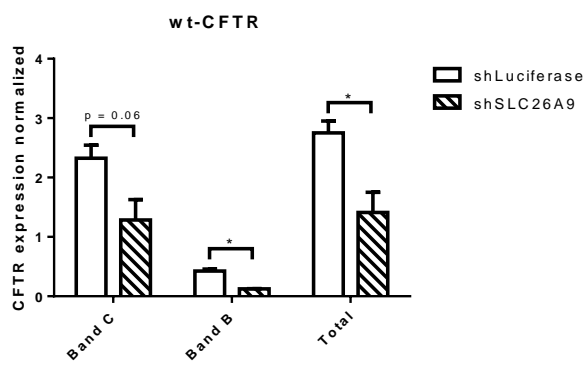

Figure S4

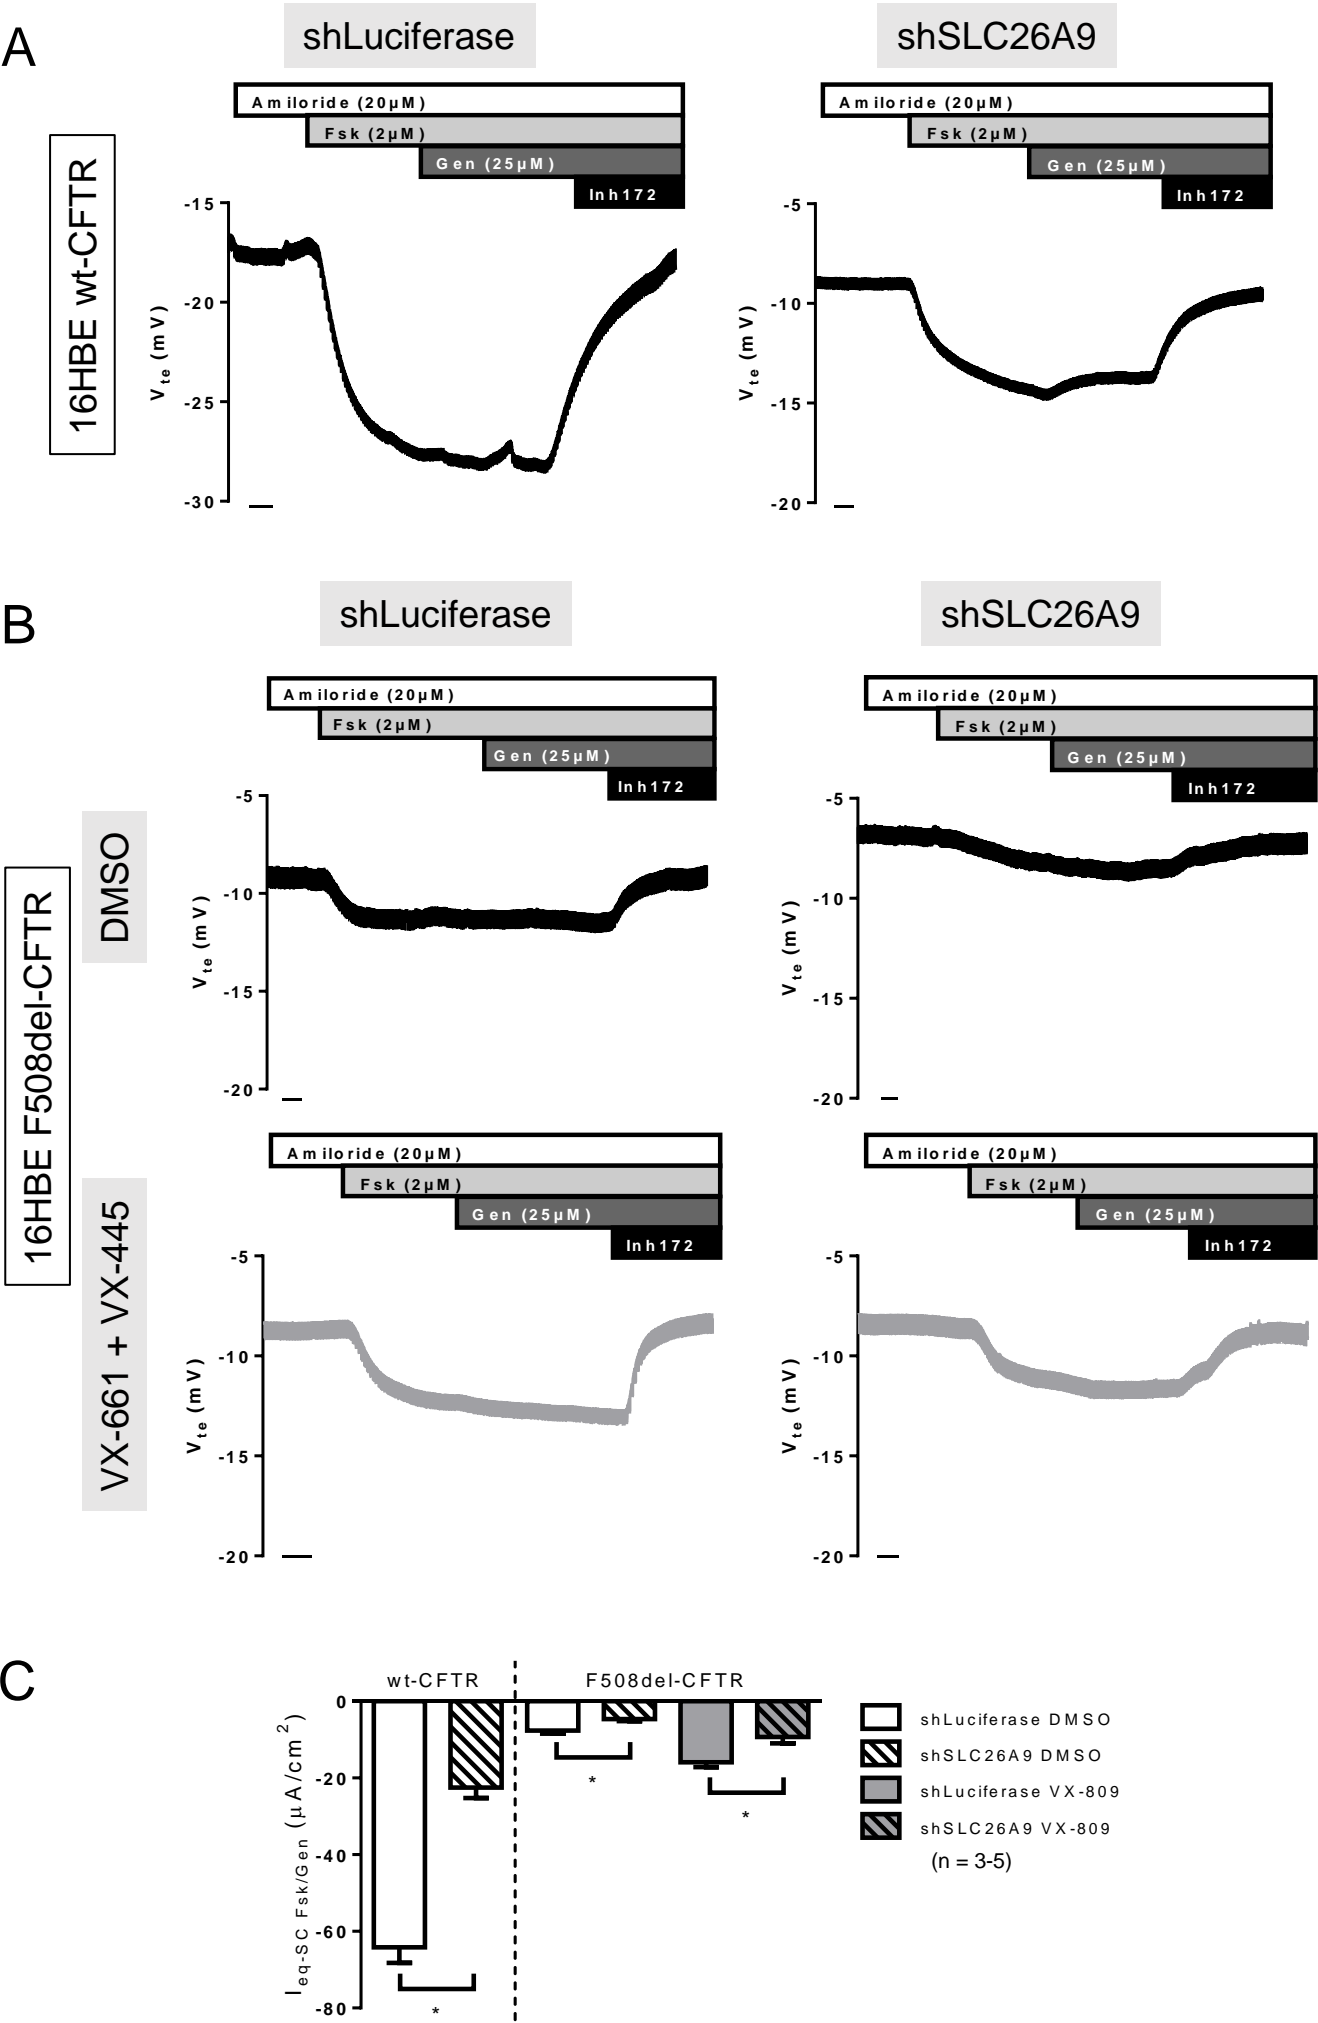

Figure S5

A

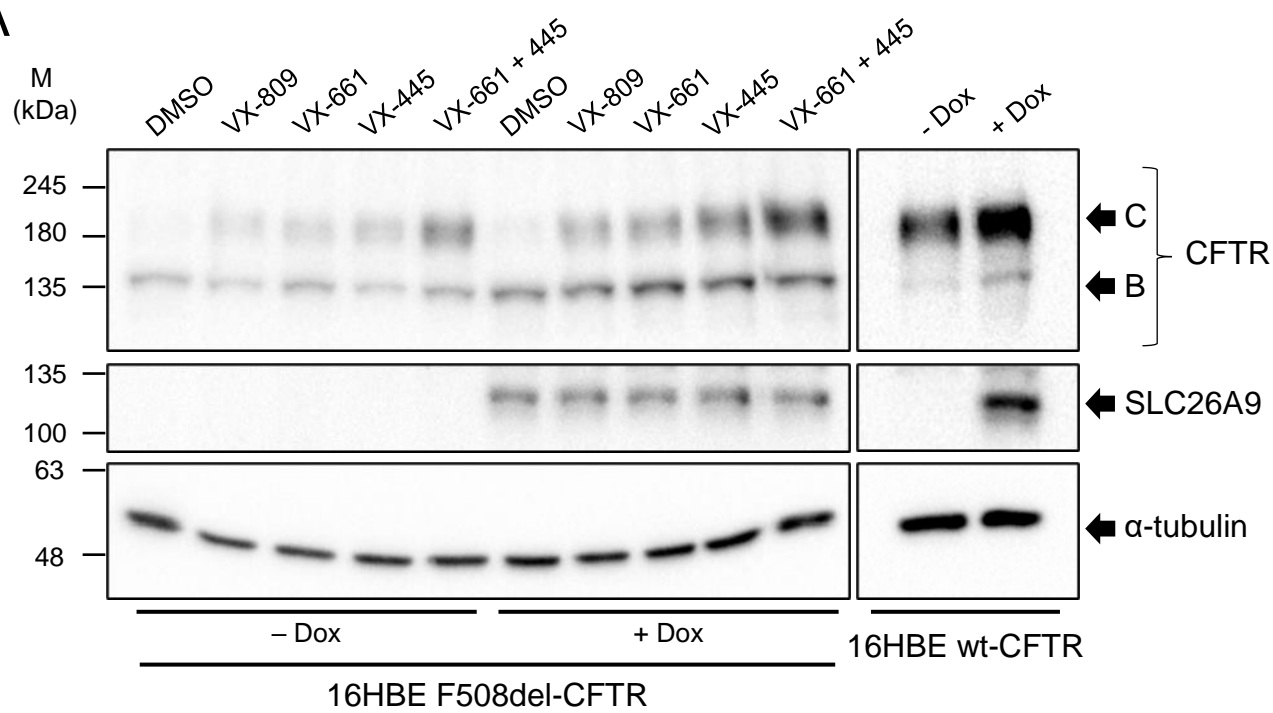

B

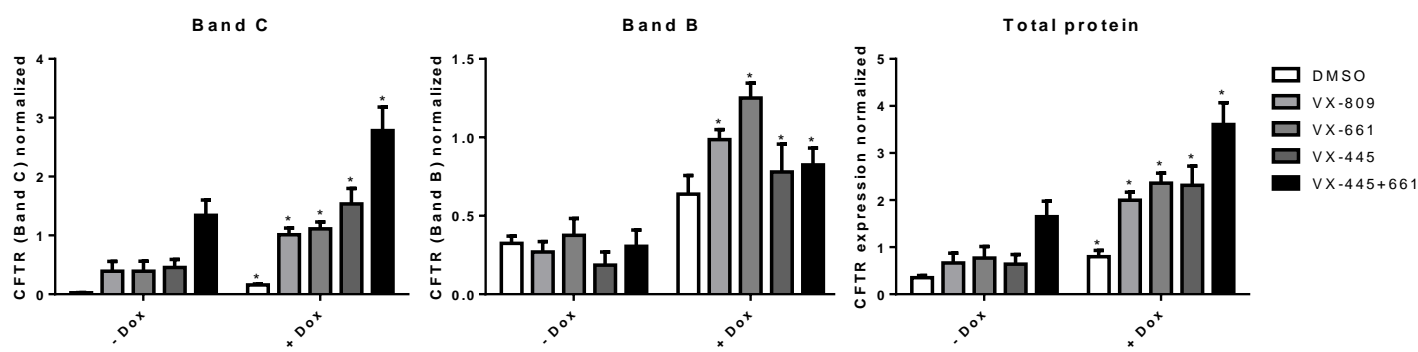

C

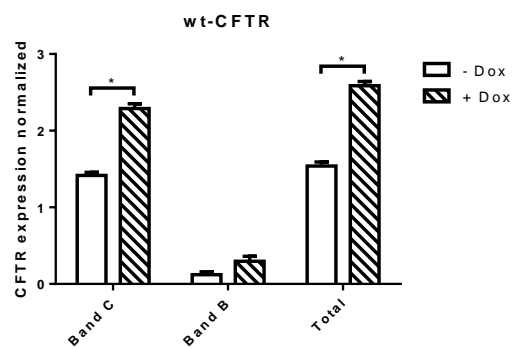

Figure S6

A

SLC26A9 knockdown

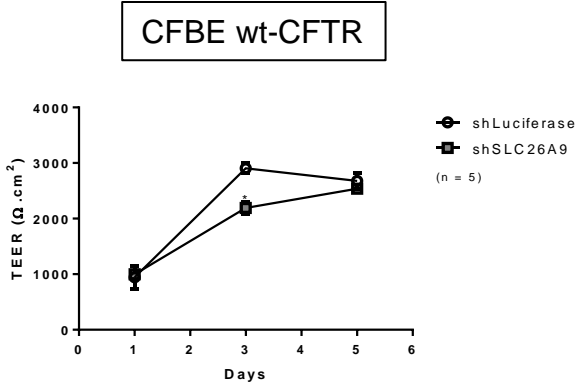

B

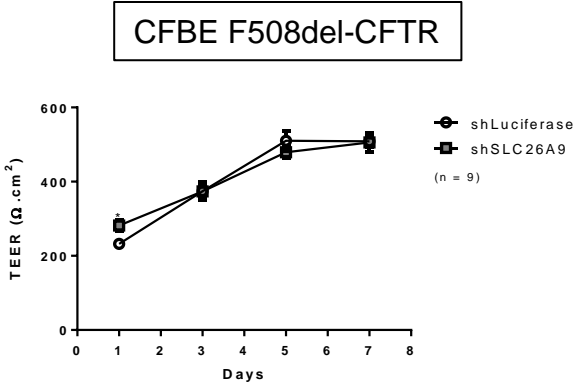

C

SLC26A9 overexpression

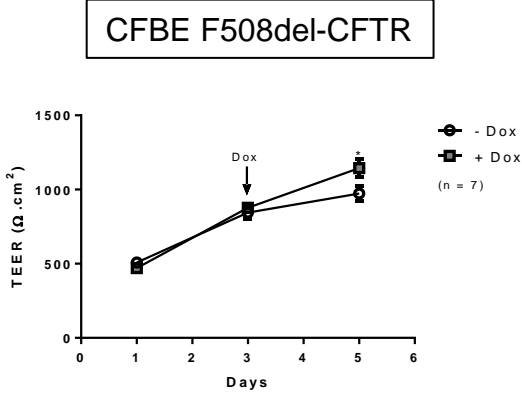

Supplement: s1 [file s1]
